# Supplementary material for: Deformation-Thermal Co-Induced Ferromagnetism of Austenite Nanocrystalline FeCoCr Powders for Strong Microwave Absorption
Source: MDPI journal article supplement (doi:10.3390/nano12132263), 2022-06-30
Supplement: s1 [file s1]

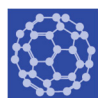

Supplementary Material for:

# Deformation-Thermal Co-Induced Ferromagnetism of Austenite Nanocrystalline FeCoCr Powders for Strong Microwave Absorption

Ziwen Fu <sup>1</sup>, Zhihong Chen <sup>1,2,\*</sup>, Rui Wang <sup>2</sup>, Hanyan Xiao <sup>2</sup>, Jun Wang <sup>2</sup>, Hao Yang <sup>1</sup>, Yueting Shi <sup>1</sup>, Wei Li <sup>2</sup> and Jianguo Guan <sup>2,\*</sup>

<sup>1</sup> School of Science, Wuhan University of Technology, Wuhan 430070, China; ziwenfu@whut.edu.cn (Z.F.); 261222@whut.edu.cn (H.Y.); 261179@whut.edu.cn (Y.S.)

<sup>2</sup> State Key Laboratory of Advanced Technology for Materials Synthesis and Processing, Wuhan University of Technology, Wuhan 430070, China; 303565@whut.edu.cn (R.W.); hanyan\_xiao@whut.edu.cn (H.X.); 303841@whut.edu.cn (J.W.); wellee@whut.edu.cn (W.L.)

\* Correspondence: z\_chen@whut.edu.cn (Z.C.); guanjq@whut.edu.cn (J.G.)

**Table S1.** Element composition of FeCoCr powders.

| Sample      | Fe (wt. %) | Co (wt. %) | Cr (wt. %) |
|-------------|------------|------------|------------|
| Raw powder  | 42.88      | 41.85      | 15.27      |
| Milling 4 h | 42.37      | 42.28      | 15.35      |

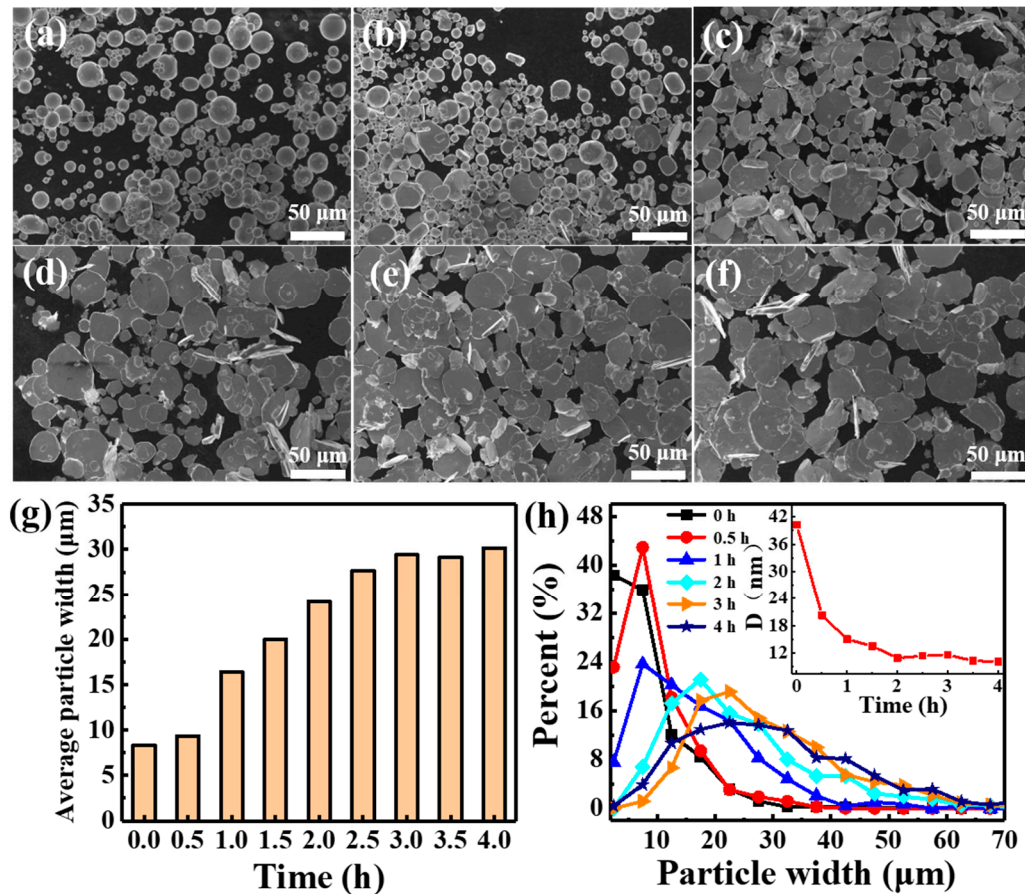

**Figure S1.** (a–f) SEM images of FeCoCr particles after ball milling for 0, 0.5, 1, 2, 3 and 4 h, respectively; (g) Change of particle width at different milling time; (h) Change of particle width distribution at different milling time. Inset in (h) is the change of grain size at different milling time.

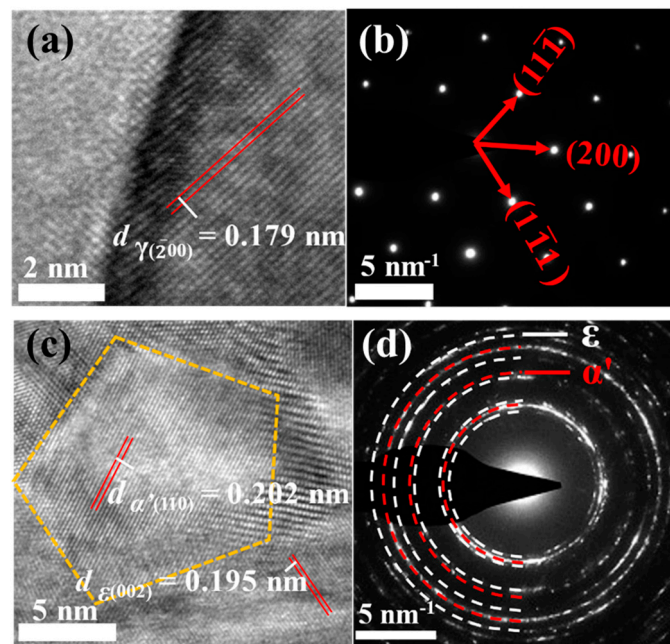

**Figure S2.** (a) High-resolution TEM image and (b) SEAD pattern of raw FeCoCr powder; (c) High-resolution TEM image and (d) SAED pattern of FeCoCr powder milled for 4 h.

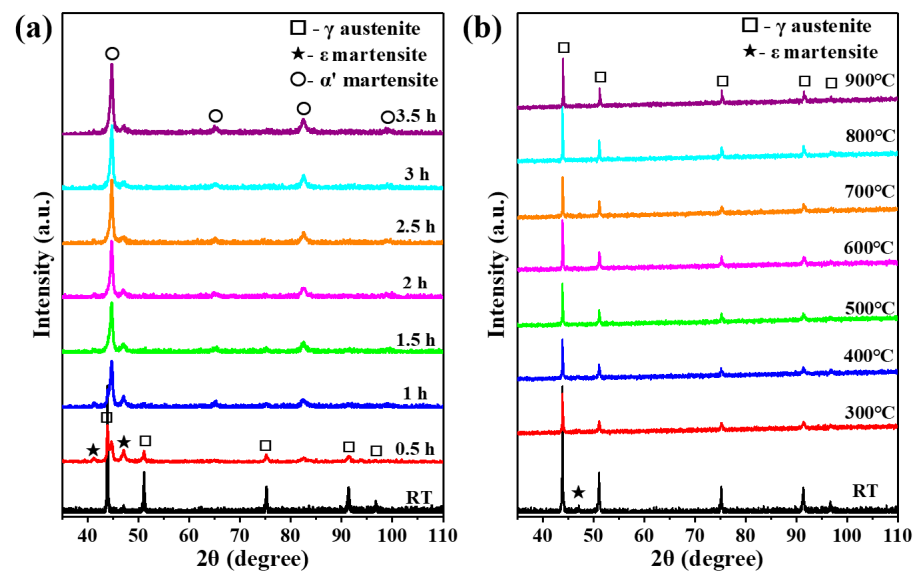

**Figure S3.** XRD spectra of FeCoCr powders (a) after ball milling for different time and (b) after heat treatment at different time without deformation.

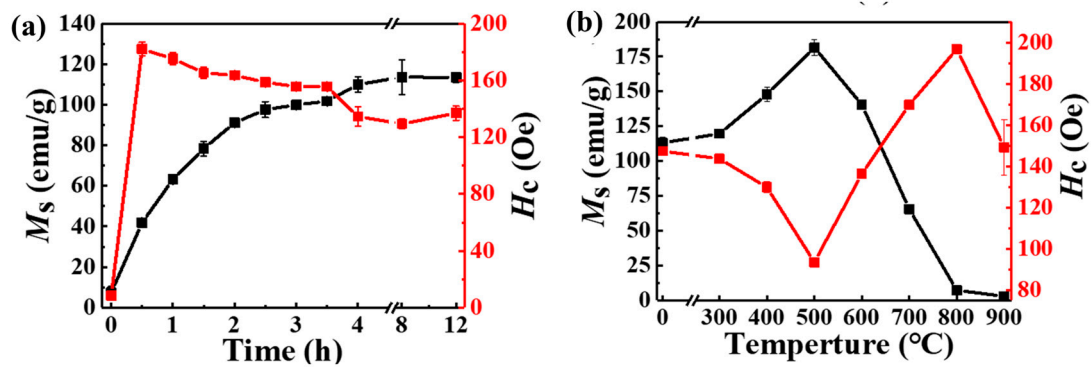

Figure S4. Evolution of saturation magnetization ( $M_s$ ) and coercivity ( $H_c$ ) during (a) ball milling and (b) subsequent heat treatment.

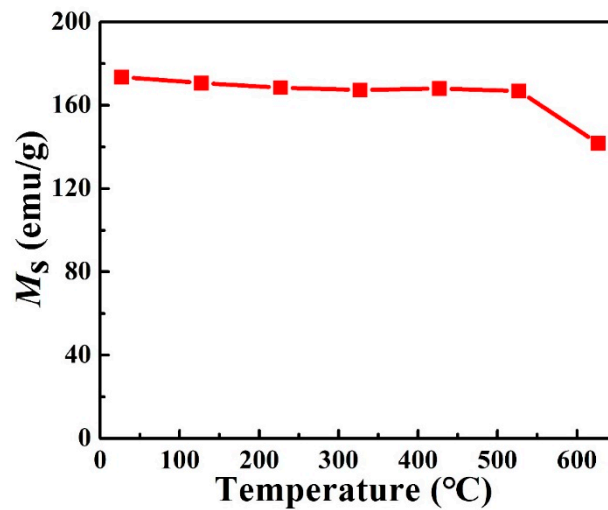

Figure S5. Change of  $M_s$  with the increase of temperature for FeCoCr powders after milling for 4 h and heat treatment at 500  $^{\circ}\text{C}$ .

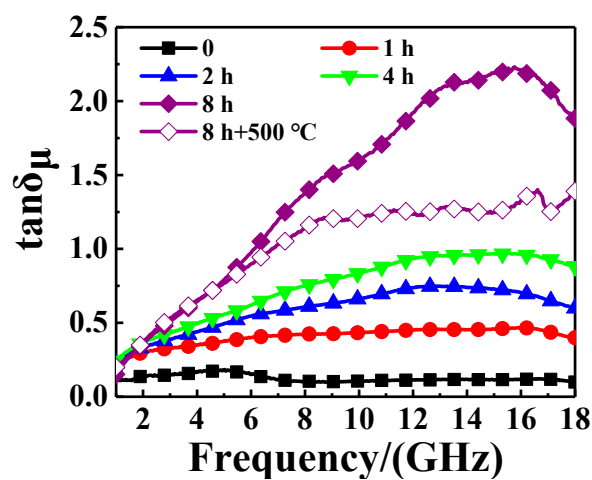

Figure S6. Change of magnetic loss tangents ( $\tan\delta_\mu$ ) in FeCoCr powders at different milling time.
